# Supplementary material
Source: PubMed Central journal article supplement (PMC3195580)
Supplement: supp_M111.276238_jbc.M111.276238-1.pdf [file supp_M111.276238_jbc.M111.276238-1.pdf]

## Supplementary Data

**ORPHAN MACRODOMAIN (HUMAN C6ORF130) IS AN *O*-ACYL-ADP-RIBOSE  
DEACYLASE: SOLUTION STRUCTURE AND CATALYTIC PROPERTIES**  
**Francis C. Peterson<sup>1§</sup>, Dawei Chen<sup>1¶</sup>, Betsy L. Lytle<sup>1§</sup>, Marianna N. Rossi<sup>#</sup>, Ivan Ahel<sup>#</sup>,  
John M. Denu<sup>2¶</sup>, and Brian F. Volkman<sup>2§</sup>**

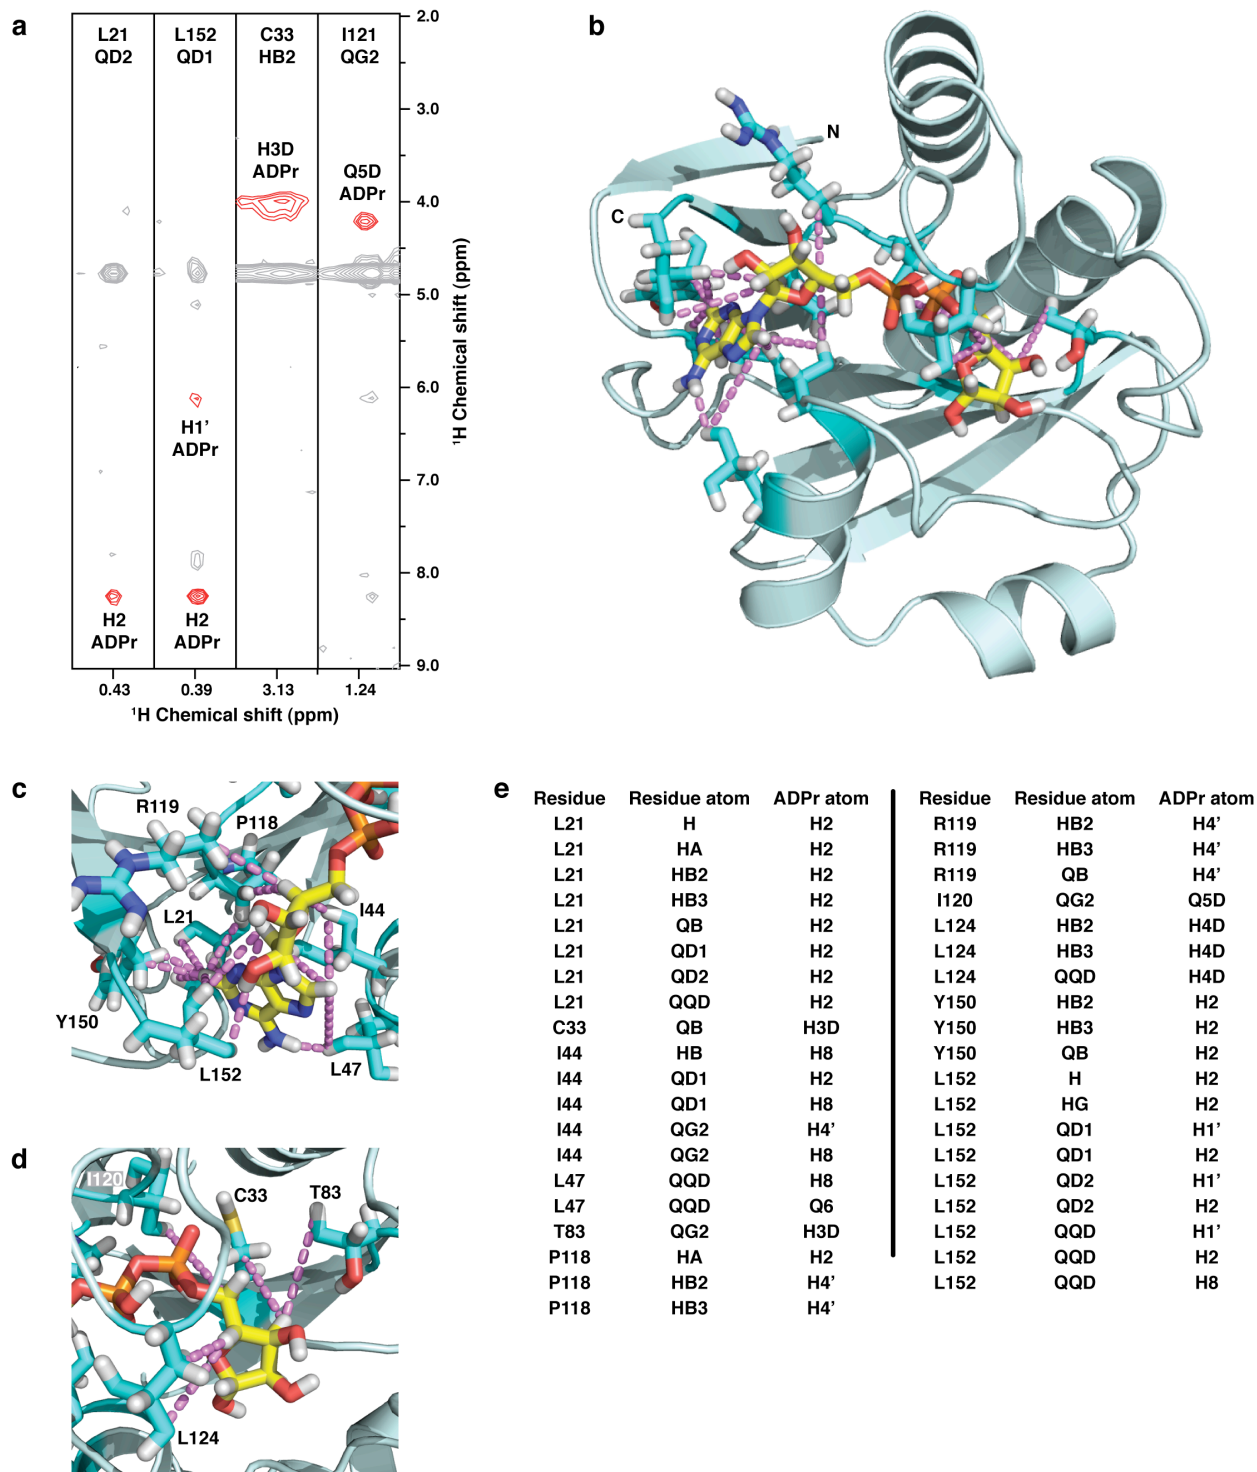

**Figure S1. Intermolecular NOE contacts defining the C6orf130:ADPr complex.** (a) Representative strips from the 3D  $^{13}\text{C}$ -edited/ $^{13}\text{C}$ -filtered NOESY spectrum containing intermolecular NOE crosspeaks. (b) Overview of the bound ADPr ligand with NOE distance constraints. Close-up views of the adenosine and proximal ribose (c) and distal ribose (d) with intermolecular NOE constraints. (e) All intermolecular NOEs used to solve the structure are listed.

**Table S1. Sequence comparison of C6orf130 protein with macro family proteins**

---

| Proteins                 | C6orf130 <sup>a</sup> | MacroD1 <sup>b</sup> | MacroD2 | <i>E. coli</i> YmdB | <i>S. aureus</i> |
|--------------------------|-----------------------|----------------------|---------|---------------------|------------------|
| SAV0325                  |                       |                      |         |                     |                  |
| <hr/>                    |                       |                      |         |                     |                  |
| C6orf130                 |                       | 19.7 <sup>c</sup>    | 19.1    | 17.8                | 21.7             |
| macroD1                  |                       |                      | 61.1    | 47.2                | 38.5             |
| macroD2                  |                       |                      |         | 49.7                | 32.3             |
| <i>E. coli</i> YmdB      |                       |                      |         |                     | 40.7             |
| <i>S. aureus</i> SAV0325 |                       |                      |         |                     |                  |

---

<sup>a</sup>Mungall, A. J. et al. (2003) *Nature* **425**, 805-811.

<sup>b</sup>Chen, D. et al. (2011) *J. Biol. Chem.* **286**, 13261-13271

<sup>c</sup>Numbers indicate percentage of sequence identity between the overlapping region of the two sequences compared.
